# Supplementary material for: The movement and distribution of pregnant spotted ragged-tooth sharks, Carcharias taurus, in the iSimangaliso Wetland Park, South Africa
Source: PeerJ. 2024 Dec 20;12:e18736. doi: 10.7717/peerj.18736 (PMC11669311; doi:10.7717/peerj.18736)
Supplement: Supplemental Information 1 — Raw data on all shark individuals identified during the 5-year study period (2018–2023): details on each individual’s sex (female or male), whether they were observed in more than one season (yes or no), the number of sightings per season, the total number of encounters, and, for females, their pregnancy status. [file peerj-12-18736-s001.xlsx]

## Sheet: Master
ID	Sex	Seen on more than one season	2018-2019	2019-2020	2020-2021	2021-2022	2022-2023	Total number encounters	Pregnancy (Y - YES, U - UNKNOWN)
4_Ct_F	F	N	3	-	-	-	-	3	Y
5_Ct_F	F	N	1	-	-	-	-	1	Y
6_Ct_F	F	N	1	-	-	-	-	1	Y
7_Ct_F	F	N	6	-	-	-	-	6	Y
9_Ct_F	F	N	2	-	-	-	-	2	Y
10_Ct_F	F	N	1	-	-	-	-	1	Y
11_Ct_F	F	N	2	-	-	-	-	2	Y
13_Ct_F	F	N	1	-	-	-	-	1	Y
14_Ct_F	F	N	1	-	-	-	-	1	Y
16_Ct_F	F	N	6	-	-	-	-	6	Y
17_Ct_F	F	N	1	-	-	-	-	1	Y
18_Ct_F	F	N	1	-	-	-	-	1	Y
22_Ct_F	F	N	1	-	-	-	-	1	U
24_Ct_F	F	N	4	-	-	-	-	4	Y
26_Ct_F	F	N	1	-	-	-	-	1	Y
27_Ct_F	F	Y	4	-	-	1	-	5	U
29_Ct_F	F	N	1	-	-	-	-	1	Y
30_Ct_F	F	N	1	-	-	-	-	1	Y
33_Ct_F	F	N	1	-	-	-	-	1	Y
34_Ct_F	F	N	1	-	-	-	-	1	Y
35_Ct_F	F	N	1	-	-	-	-	1	Y
37_Ct_F	F	Y	1	-	-	1		2	Y
40_Ct_F	F	N	5	-	-	-	-	5	Y
41_Ct_F	F	N	8	-	-	-	-	8	Y
46_Ct_F	F	N	6	-	-	-	-	6	Y
48_Ct_F	F	N	3	-	-	-	-	3	Y
49_Ct_F	F	Y	12	-	-	1		13	Y
50_Ct_F	F	N	3	-	-	-	-	3	Y
52_Ct_F	F	N	1	-	-	-	-	1	U
55_Ct_F	F	N	3	-	-	-	-	3	Y
56_Ct_F	F	N	2	-	-	-	-	2	Y
57_Ct_F	F	N	1	-	-	-	-	1	U
58_Ct_F	F	N	5	-	-	-	-	5	Y
60_Ct_F	F	N	2	-	-	-	-	2	Y
63_Ct_F	F	N	3	-	-	-	-	3	Y
64_Ct_F	F	N	3	-	-	-	-	3	Y
67_Ct_F	F	N	-	1	-	-	-	1	Y
68_Ct_F	F	N	-	1	-	-	-	1	Y
70_Ct_F	F	N	-	1	-	-	-	1	Y
71_Ct_F	F	N	-	1	-	-	-	1	Y
73_Ct_F	F	N	-	1	-	-	-	1	Y
75_Ct_F	F	N	-	1	-	-	-	1	Y
77_Ct_F	F	N	-	1	-	-	-	1	Y
78_Ct_F	F	N	-	1	-	-	-	1	Y
82_Ct_F	F	N	-	1	-	-	-	1	Y
87_Ct_F	F	N	-	5	-	-	-	5	Y
88_Ct_F	F	N	-	3	-	-	-	3	y
89_Ct_F	F	N	-	1	-	-	-	1	y
90_Ct_F	F	N	-	1	-	-	-	1	y
91_Ct_F	F	N	-	1	-	-	-	1	y
92_Ct_F	F	N	-	1	-	-	-	1	y
93_Ct_F	F	N	-	1	-	-	-	1	y
95_Ct_F	F	N	-	1	-	-	-	1	y
96_Ct_F	F	N	-	1	-	-	-	1	y
97_Ct_F	F	N	-	1	-	-	-	1	y
99_Ct_F	F	Y	-	1	-	-	1	2	Y
100_Ct_F	F	N	-	1	-	-	-	1	Y
101_Ct_F	F	N	-	1	-	-	-	1	Y
102_Ct_F	F	N	-	1	-	-	-	1	Y
103_Ct_F	F	N	-	1	-	-	-	1	Y
104_Ct_F	F	N	-	1	-	-	-	1	Y
106_Ct_F	F	Y	-	1	-	-	1	2	Y
107_Ct_F	F	N	-	1	-	-	-	1	Y
108_Ct_F	F	N	-	1	-	-	-	1	Y
109_Ct_F	F	N	-	4	-	-	-	4	Y
110_Ct_F	F	N	-	4	-	-	-	4	Y
111_Ct_F	F	N	-	1	-	-	-	1	Y
112_Ct_F	F	N	-	1	-	-	-	1	Y
114_Ct_F	F	N	-	1	-	-	-	1	Y
115_Ct_F	F	N	-	1	-	-	-	1	Y
117_Ct_F	F	N	-	1	-	-	-	1	Y
118_Ct_F	F	N	-	1	-	-	-	1	Y
120_Ct_F	F	N	-	1	-	-	-	1	Y
121_Ct_F	F	N	-	11	-	-	-	11	Y
122_Ct_F	F	Y	-	2	-	-	5	7	Y
123_Ct_F	F	N	-	1	-	-	-	1	Y
124_Ct_F	F	N	-	2	-	-	-	2	Y
126_Ct_F	F	N	-	1	-	-	-	1	Y
128_Ct_F	F	N	-	1	-	-	-	1	U
133_Ct_F	F	N	-	18	-	-	-	18	Y
134_Ct_F	F	N	-	1	-	-	-	1	Y
135_Ct_F	F	N	-	1	-	-	-	1	Y
136_Ct_F	F	N	-	1	-	-	-	1	Y
139_Ct_F	F	N	-	3	-	-	-	3	U
142_Ct_F	F	N	-	3	-	-	-	3	Y
145_Ct_F	F	N	-	2	-	-	-	2	Y
148_Ct_F	F	N	-	3	-	-	-	3	Y
149_Ct_F	F	N	-	3	-	-	-	3	Y
153_Ct_F	F	N	-	2	-	-	-	2	Y
155_Ct_F	F	N	-	2	-	-	-	2	Y
156_Ct_F	F	N	-	1	-	-	-	1	Y
157_Ct_F	F	N	-	5	-	-	-	5	Y
158_Ct_F	F	N	-	3	-	-	-	3	Y
159_Ct_F	F	N	-	6	-	-	-	6	Y
161_Ct_F	F	N	-	5	-	-	-	5	Y
162_Ct_F	F	N	-	1	-	-	-	1	Y
166_Ct_F	F	N	-	13	-	-	-	13	Y
167_Ct_F	F	N	-	1	-	-	-	1	Y
168_Ct_F	F	N	-	2	-	-	-	2	U
169_Ct_F	F	N	-	5	-	-	-	5	Y
170_Ct_F	F	N	-	1	-	-	-	1	Y
171_Ct_F	F	N	-	12	-	-	-	12	Y
174_Ct_F	F	N	-	2	-	-	-	2	U
175_Ct_F	F	N	-	2	-	-	-	2	Y
178_Ct_F	F	N	-	2	-	-	-	2	Y
179_Ct_F	F	N	-	1	-	-	-	1	Y
181_Ct_F	F	N	-	1	-	-	-	1	Y
182_Ct_F	F	N	-	1	-	-	-	1	Y
183_Ct_F	F	N	-	1	-	-	-	1	Y
184_Ct_F	F	N	-	1	-	-	-	1	Y
186_Ct_F	F	N	-	2	-	-	-	2	Y
188_Ct_F	F	N	-	2	-	-	-	2	Y
189_Ct_F	F	N	-	1	-	-	-	1	Y
190_Ct_F	F	N	-	1	-	-	-	1	Y
192_Ct_F	F	N	-	1	-	-	-	1	Y
195_Ct_F	F	N	-	1	-	-	-	1	Y
196_Ct_F	F	N	-	1	-	-	-	1	Y
197_Ct_F	F	N	-	1	-	-	-	1	Y
198_Ct_F	F	N	-	1	-	-	-	1	Y
201_Ct_F	F	N	-	1	-	-	-	1	Y
202_Ct_F	F	N	-	1	-	-	-	1	Y
204_Ct_F	F	N	-	1	-	-	-	1	Y
208_Ct_F	F	N	-	3	-	-	-	3	Y
209_Ct_F	F	N	-	1	-	-	-	1	Y
210_Ct_F	F	N	-	2	-	-	-	2	Y
212_Ct_F	F	N	-	2	-	-	-	2	U
213_Ct_F	F	N	-	4	-	-	-	4	Y
214_Ct_F	F	N	-	1	-	-	-	1	Y
216_Ct_F	F	N	-	1	-	-	-	1	Y
218_Ct_F	F	N	-	1	-	-	-	1	Y
219_Ct_F	F	N	-	1	-	-	-	1	Y
220_Ct_F	F	N	-	1	-	-	-	1	Y
221_Ct_F	F	N	-	1	-	-	-	1	Y
223_Ct_F	F	N	-	1	-	-	-	1	Y
224_Ct_F	F	N	-	1	-	-	-	1	Y
225_Ct_F	F	N	-	1	-	-	-	1	Y
229_Ct_F	F	N	-	1	-	-	-	1	Y
232_Ct_F	F	N	-	1	-	-	-	1	Y
234_Ct_F	F	N	-	1	-	-	-	1	Y
235_Ct_F	F	N	-	1	-	-	-	1	Y
236_Ct_F	F	N	-	1	-	-	-	1	Y
237_Ct_F	F	N	-	1	-	-	-	1	Y
240_Ct_F	F	N	-	1	-	-	-	1	Y
241_Ct_F	F	N	-	1	-	-	-	1	Y
242_Ct_F	F	N	-	1	-	-	-	1	Y
243_Ct_F	F	N	-	1	-	-	-	1	Y
245_Ct_F	F	N	-	3	-	-	-	3	Y
246_Ct_F	F	N	-	1	-	-	-	1	Y
248_Ct_F	F	N	-	2	-	-	-	2	Y
251_Ct_F	F	N	-	1	-	-	-	1	Y
253_Ct_F	F	N	-	1	-	-	-	1	Y
254_Ct_F	F	N	-	1	-	-	-	1	Y
256_Ct_F	F	N	-	2	-	-	-	2	Y
257_Ct_F	F	N	-	1	-	-	-	1	Y
259_Ct_F	F	N	-	2	-	-	-	2	Y
262_Ct_F	F	N	-	15	-	-	-	15	Y
263_Ct_F	F	N	-	1	-	-	-	1	Y
264_Ct_F	F	N	-	1	-	-	-	1	Y
265_Ct_F	F	N	-	2	-	-	-	2	Y
266_Ct_F	F	N	-	1	-	-	-	1	Y
275_Ct_F	F	N	-	1	-	-	-	1	Y
276_Ct_F	F	N	-	1	-	-	-	1	Y
281_Ct_F	F	Y	-	2	-	1	-	3	Y
282_Ct_F	F	N	-	2	-	-	-	2	Y
284_Ct_F	F	N	-	1	-	-	-	1	Y
287_Ct_F	F	N	-	2	-	-	-	2	U
288_Ct_F	F	N	-	2	-	-	-	2	Y
289_Ct_F	F	N	-	2	-	-	-	2	Y
291_Ct_F	F	N	-	1	-	-	-	1	Y
294_Ct_F	F	N	-	10	-	-	-	10	Y
295_Ct_F	F	N	-	4	-	-	-	4	Y
298_Ct_F	F	N	-	1	-	-	-	1	Y
301_Ct_F	F	N	-	1	-	-	-	1	Y
307_Ct_F	F	N	-	1	-	-	-	1	Y
308_Ct_F	F	N	-	1	-	-	-	1	Y
309_Ct_F	F	N	-	1	-	-	-	1	Y
310_Ct_F	F	N	-	1	-	-	-	1	Y
311_Ct_F	F	N	-	16	-	-	-	16	Y
312_Ct_F	F	N	-	1	-	-	-	1	Y
313_Ct_F	F	N	-	1	-	-	-	1	Y
314_Ct_F	F	N	-	1	-	-	-	1	Y
316_Ct_F	F	N	-	2	-	-	-	2	Y
318_Ct_F	F	N	-	6	-	-	-	6	Y
319_Ct_F	F	N	-	1	-	-	-	1	Y
322_Ct_F	F	N	-	1	-	-	-	1	Y
323_Ct_F	F	N	-	7	-	-	-	7	Y
325_Ct_F	F	N	-	1	-	-	-	1	Y
327_Ct_F	F	N	-	1	-	-	-	1	U
332_Ct_F	F	N	-	5	-	-	-	5	Y
334_Ct_F	F	Y	-	1	-	-	1	2	Y
336_Ct_F	F	N	-	2	-	-	-	2	Y
337_Ct_F	F	N	-	2	-	-	-	2	Y
342_Ct_F	F	N	-	2	-	-	-	2	Y
344_Ct_F	F	N	-	3	-	-	-	3	Y
345_Ct_F	F	N	-	9	-	-	-	8	Y
348_Ct_F	F	N	-	4	-	-	-	4	Y
350_Ct_F	F	N	-	8	-	-	-	8	Y
351_Ct_F	F	N	-	6	-	-	-	6	Y
352_Ct_F	F	N	-	9	-	-	-	9	Y
356_Ct_F	F	N	-	8	-	-	-	8	Y
357_Ct_F	F	N	-	11	-	-	-	9	Y
358_Ct_F	F	N	-	13	-	-	-	12	Y
359_Ct_F	F	N	-	4	-	-	-	4	Y
360_Ct_F	F	N	-	1	-	-	-	1	Y
362_Ct_F	F	N	-	1	-	-	-	1	Y
365_Ct_F	F	N	-	8	-	-	-	8	Y
367_Ct_F	F	N	-	8	-	-	-	8	Y
370_Ct_F	F	N	-	2	-	-	-	2	U
372_Ct_F	F	N	-	1	-	-	-	1	Y
374_Ct_F	F	N	-	11	-	-	-	11	Y
375_Ct_F	F	Y	-	7	-	-	12	19	Y
376_Ct_F	F	N	-	5	-	-	-	5	Y
378_Ct_F	F	N	-	1	-	-	-	1	Y
386_Ct_F	F	N	-	2	-	-	-	2	Y
390_Ct_F	F	N	-	4	-	-	-	5	Y
391_Ct_F	F	N	-	5	-	-	-	4	Y
392_Ct_F	F	N	-	3	-	-	-	2	Y
395_Ct_F	F	N	-	1	-	-	-	1	Y
396_Ct_F	F	N	-	1	-	-	-	1	Y
397_Ct_F	F	N	-	1	-	-	-	1	Y
398_Ct_F	F	N	-	1	-	-	-	1	Y
399_Ct_F	F	N	-	1	-	-	-	1	Y
402_Ct_F	F	N	-	1	-	-	-	1	Y
403_Ct_F	F	Y	-	2	-	-	1	3	Y
404_Ct_F	F	N	-	3	-	-	-	3	Y
405_Ct_F	F	N	-	1	-	-	-	1	Y
406_Ct_F	F	N	-	1	-	-	-	1	Y
407_Ct_F	F	N	-	2	-	-	-	2	Y
409_Ct_F	F	N	-	1	-	-	-	1	Y
417_Ct_F	F	N	-	-	3	-	-	3	U
418_Ct_F	F	N	-	-	1	-	-	1	Y
420_Ct_F	F	N	-	-	1	-	-	1	Y
421_Ct_F	F	N	-	-	1	-	-	1	Y
423_Ct_F	F	N	-	-	1	-	-	1	Y
424_Ct_F	F	N	-	-	1	-	-	1	Y
426_Ct_F	F	N	-	-	1	-	-	1	Y
429_Ct_F	F	N	-	-	2	-	-	2	Y
431_Ct_F	F	N	-	-	1	-	-	1	Y
432_Ct_F	F	N	-	-	8	-	-	8	Y
433_Ct_F	F	N	-	-	2	-	-	2	Y
434_Ct_F	F	N	-	-	1	-	-	1	Y
435_Ct_F	F	N	-	-	1	-	-	1	Y
439_Ct_F	F	N	-	-	1	-	-	1	Y
442_Ct_F	F	N	-	-	1	-	-	1	Y
444_Ct_F	F	N	-	-	1	-	-	1	Y
445_Ct_F	F	N	-	-	4	-	-	4	Y
446_Ct_F	F	N	-	-	1	-	-	1	Y
447_Ct_F	F	N	-	-	1	-	-	1	Y
450_Ct_F	F	N	-	-	7	-	-	7	Y
451_Ct_F	F	N	-	-	2	-	-	2	Y
453_Ct_F	F	N	-	-	1	-	-	1	Y
455_Ct_F	F	N	-	-	2	-	-	2	Y
457_Ct_F	F	N	-	-	4	-	-	4	Y
461_Ct_F	F	N	-	-	2	-	-	2	Y
462_Ct_F	F	N	-	-	1	-	-	1	Y
463_Ct_F	F	N	-	-	5	-	-	5	Y
464_Ct_F	F	N	-	-	1	-	-	1	Y
466_Ct_F	F	N	-	-	2	-	-	2	Y
468_Ct_F	F	N	-	-	1	-	-	1	Y
469_Ct_F	F	N	-	-	1	-	-	1	Y
471_Ct_F	F	N	-	-	2	-	-	2	Y
472_Ct_F	F	N	-	-	1	-	-	1	Y
473_Ct_F	F	N	-	-	1	-	-	1	Y
474_Ct_F	F	N	-	-	3	-	-	3	Y
475_Ct_F	F	N	-	-	2	-	-	2	Y
477_Ct_F	F	N	-	-	2	-	-	2	Y
481_Ct_F	F	N	-	-	1	-	-	1	Y
482_Ct_F	F	N	-	-	2	-	-	2	Y
485_Ct_F	F	N	-	-	1	-	-	1	Y
486_Ct_F	F	N	-	-	1	-	-	1	Y
488_Ct_F	F	N	-	-	1	-	-	1	Y
489_Ct_F	F	Y	-	-	1	-	1	2	Y
491_Ct_F	F	N	-	-	1	-	-	1	Y
492_Ct_F	F	N	-	-	2	-	-	2	Y
493_Ct_F	F	N	-	-	1	-	-	1	Y
494_Ct_F	F	N	-	-	3	-	-	3	Y
495_Ct_F	F	N	-	-	6	-	-	6	Y
496_Ct_F	F	N	-	-	5	-	-	5	Y
497_Ct_F	F	N	-	-	1	-	-	1	Y
499_Ct_F	F	N	-	-	1	-	-	1	Y
500_Ct_F	F	N	-	-	1	-	-	1	Y
504_Ct_F	F	N	-	-	1	-	-	1	Y
505_Ct_M	M	N	-	-	2	-	-	2	-
506_Ct_F	F	N	-	-	1	-	-	1	Y
508_Ct_F	F	N	-	-	1	-	-	1	Y
510_Ct_F	F	N	-	-	1	-	-	1	Y
511_Ct_F	F	Y	-	-	1	-	1	2	Y
517_Ct_F	F	N	-	-	3	-	-	3	Y
519_Ct_F	F	N	-	-	1	-	-	1	Y
520_Ct_F	F	N	-	-	3	-	-	3	Y
522_Ct_F	F	N	-	-	1	-	-	1	Y
524_Ct_F	F	N	-	-	1	-	-	1	Y
528_Ct_F	F	N	-	-	5	-	-	5	Y
530_Ct_F	F	N	-	-	3	-	-	3	Y
534_Ct_F	F	N	-	-	1	-	-	1	Y
538_Ct_F	F	N	-	-	3	-	-	3	Y
539_Ct_F	F	N	-	-	2	-	-	2	Y
541_Ct_F	F	N	-	-	1	-	-	1	Y
542_Ct_F	F	N	-	-	2	-	-	2	Y
543_Ct_F	F	N	-	-	4	-	-	4	Y
546_Ct_F	F	N	-	-	1	-	-	1	Y
549_Ct_F	F	N	-	-	4	-	-	4	Y
550_Ct_F	F	N	-	-	3	-	-	3	Y
551_Ct_F	F	N	-	-	1	-	-	1	Y
553_Ct_F	F	N	-	-	1	-	-	1	Y
555_Ct_F	F	N	-	-	2	-	-	2	Y
556_Ct_F	F	N	-	-	1	-	-	1	Y
558_Ct_F	F	N	-	-	1	-	-	1	Y
559_Ct_F	F	N	-	-	1	-	-	1	Y
560_Ct_F	F	N	-	-	1	-	-	1	Y
562_Ct_F	F	N	-	-	1	-	-	1	Y
563_Ct_F	F	N	-	-	1	-	-	1	Y
564_Ct_F	F	N	-	-	1	-	-	1	Y
567_Ct_F	F	N	-	-	2	-	-	2	Y
570_Ct_F	F	N	-	-	1	-	-	1	Y
572_Ct_F	F	N	-	-	3	-	-	3	Y
576_Ct_F	F	N	-	-	2	-	-	2	Y
577_Ct_F	F	N	-	-	1	-	-	1	Y
580_Ct_F	F	N	-	-	2	-	-	2	Y
589_Ct_F	F	N	-	-	1	-	-	1	Y
592_Ct_F	F	N	-	-	3	-	-	3	Y
593_Ct_F	F	N	-	-	1	-	-	1	Y
594_Ct_F	F	N	-	-	1	-	-	1	Y
596_Ct_F	F	N	-	-	3	-	-	3	Y
599_Ct_F	F	N	-	-	1	-	-	1	Y
600_Ct_F	F	N	-	-	6	-	-	6	Y
601_Ct_F	F	N	-	-	2	-	-	2	Y
605_Ct_F	F	N	-	-	2	-	-	2	Y
607_Ct_F	F	N	-	-	1	-	-	1	Y
612_Ct_F	F	N	-	-	1	-	-	1	Y
613_Ct_F	F	N	-	-	6	-	-	6	Y
614_Ct_F	F	N	-	-	1	-	-	1	Y
616_Ct_F	F	N	-	-	1	-	-	1	Y
617_Ct_F	F	N	-	-	2	-	-	2	Y
618_Ct_F	F	N	-	-	1	-	-	1	Y
620_Ct_F	F	N	-	-	3	-	-	3	Y
622_Ct_F	F	N	-	-	1	-	-	1	Y
624_Ct_F	F	N	-	-	2	-	-	2	Y
625_Ct_F	F	N	-	-	3	-	-	3	Y
627_Ct_F	F	N	-	-	1	-	-	1	U
628_Ct_F	F	N	-	-	1	-	-	1	Y
629_Ct_F	F	N	-	-	1	-	-	1	Y
630_Ct_F	F	N	-	-	1	-	-	1	Y
631_Ct_F	F	N	-	-	1	-	-	1	Y
632_Ct_F	F	N	-	-	1	-	-	1	Y
633_Ct_F	F	N	-	-	1	-	-	1	Y
634_Ct_F	F	N	-	-	4	-	-	4	Y
635_Ct_F	F	N	-	-	1	-	-	1	Y
636_Ct_F	F	N	-	-	1	-	-	1	Y
640_Ct_F	F	N	-	-	1	-	-	1	Y
644_Ct_F	F	N	-	-	1	-	-	1	Y
645_Ct_F	F	N	-	-	1	-	-	1	Y
648_Ct_F	F	N	-	-	1	-	-	1	Y
649_Ct_F	F	N	-	-	1	-	-	1	Y
651_Ct_F	F	N	-	-	1	-	-	1	Y
652_Ct_F	F	N	-	-	1	-	-	1	Y
653_Ct_F	F	N	-	-	1	-	-	1	Y
654_Ct_F	F	N	-	-	1	-	-	1	Y
655_Ct_F	F	N	-	-	1	-	-	1	Y
656_Ct_F	F	N	-	-	1	-	-	1	Y
659_Ct_F	F	N	-	-	1	-	-	1	Y
660_Ct_F	F	N	-	-	1	-	-	1	Y
661_Ct_F	F	N	-	-	1	-	-	1	Y
662_Ct_F	F	N	-	-	1	-	-	1	Y
663_Ct_F	F	N	-	-	1	-	-	1	Y
665_Ct_F	F	N	-	-	2	-	-	2	Y
673_Ct_F	F	N	-	-	2	-	-	1	Y
676_Ct_F	F	N	-	-	2	-	-	2	Y
677_Ct_F	F	N	-	-	5	-	-	5	Y
678_Ct_F	F	N	-	-	1	-	-	1	Y
679_Ct_F	F	N	-	-	1	-	-	1	Y
680_Ct_F	F	N	-	-	1	-	-	1	Y
681_Ct_F	F	N	-	-	-	1	-	1	Y
684_Ct_F	F	N	-	-	-	2	-	2	Y
687_Ct_F	F	N	-	-	-	3	-	3	Y
688_Ct_F	F	N	-	-	-	5	-	5	Y
689_Ct_F	F	N	-	-	-	5	-	5	Y
690_Ct_F	F	N	-	-	-	10	-	10	Y
691_Ct_F	F	N	-	-	-	1	-	1	Y
693_Ct_F	F	N	-	-	-	1	-	1	Y
694_Ct_F	F	N	-	-	-	2	-	2	Y
695_Ct_F	F	N	-	-	-	1	-	1	Y
697_Ct_M	M	N	-	-	-	1	-	1	-
702_Ct_F	F	N	-	-	-	1	-	1	Y
703_Ct_F	F	N	-	-	-	1	-	1	Y
707_Ct_F	F	N	-	-	-	2	-	2	Y
708_Ct_F	F	N	-	-	-	1	-	1	Y
709_Ct_F	F	N	-	-	-	1	-	1	Y
710_Ct_F	F	N	-	-	-	1	-	1	Y
713_Ct_F	F	N	-	-	-	1	-	1	Y
715_Ct_F	F	N	-	-	-	3	-	3	Y
720_Ct_F	F	N	-	-	-	1	-	1	Y
721_Ct_F	F	N	-	-	-	1	-	1	Y
722_Ct_F	F	N	-	-	-	2	-	2	Y
726_Ct_F	F	N	-	-	-	2	-	2	Y
727_Ct_F	F	N	-	-	-	1	-	1	Y
731_Ct_F	F	N	-	-	-	1	-	1	Y
734_Ct_F	F	N	-	-	-	1	-	1	Y
735_Ct_F	F	N	-	-	-	1	-	1	Y
738_Ct_F	F	N	-	-	-	1	-	1	Y
739_Ct_F	F	N	-	-	-	1	-	1	Y
740_Ct_F	F	N	-	-	-	6	-	6	Y
741_Ct_F	F	N	-	-	-	5	-	5	Y
747_Ct_F	F	N	-	-	-	1	-	1	Y
748_Ct_F	F	N	-	-	-	13	-	13	Y
751_Ct_F	F	N	-	-	-	2	-	2	Y
755_Ct_F	F	N	-	-	-	4	-	4	Y
756_Ct_F	F	N	-	-	-	1	-	1	U
758_Ct_F	F	N	-	-	-	1	-	1	U
760_Ct_F	F	N	-	-	-	1	-	1	Y
761_Ct_F	F	N	-	-	-	1	-	1	Y
763_Ct_F	F	N	-	-	-	1	-	1	Y
766_Ct_F	F	N	-	-	-	1	-	1	Y
767_Ct_F	F	N	-	-	-	2	-	2	Y
770_Ct_F	F	N	-	-	-	1	-	1	Y
771_Ct_F	F	N	-	-	-	1	-	1	Y
772_Ct_F	F	N	-	-	-	1	-	1	Y
773_Ct_F	F	N	-	-	-	3	-	3	Y
777_Ct_F	F	N	-	-	-	1	-	1	Y
778_Ct_F	F	N	-	-	-	1	-	1	Y
781_Ct_F	F	N	-	-	-	2	-	2	Y
787_Ct_F	F	N	-	-	-	1	-	1	Y
789_Ct_F	F	N	-	-	-	1	-	1	Y
792_Ct_F	F	N	-	-	-	1	-	1	Y
794_Ct_F	F	N	-	-	-	2	-	2	Y
796_Ct_F	F	N	-	-	-	1	-	1	Y
800_Ct_F	F	N	-	-	-	1	-	1	Y
802_Ct_F	F	N	-	-	-	5	-	5	Y
804_Ct_F	F	N	-	-	-	2	-	2	Y
808_Ct_F	F	N	-	-	-	1	-	1	Y
812_Ct_F	F	N	-	-	-	1	-	1	Y
813_Ct_F	F	N	-	-	-	2	-	2	Y
814_Ct_F	F	N	-	-	-	1	-	1	Y
818_Ct_F	F	N	-	-	-	3	-	3	Y
821_Ct_F	F	N	-	-	-	1	-	1	Y
826_Ct_F	F	N	-	-	-	1	-	1	Y
827_Ct_F	F	N	-	-	-	1	-	1	Y
828_Ct_F	F	N	-	-	-	2	-	2	Y
829_Ct_F	F	N	-	-	-	1	-	1	Y
830_Ct_F	F	N	-	-	-	1	-	1	Y
831_Ct_F	F	N	-	-	-	2	-	2	Y
832_Ct_F	F	N	-	-	-	1	-	1	Y
833_Ct_F	F	N	-	-	-	2	-	2	Y
834_Ct_F	F	N	-	-	-	1	-	1	Y
837_Ct_F	F	N	-	-	-	2	-	2	Y
838_Ct_F	F	N	-	-	-	1	-	1	Y
839_Ct_F	F	N	-	-	-	1	-	1	Y
841_Ct_F	F	N	-	-	-	1	-	1	Y
846_Ct_F	F	N	-	-	-	1	-	1	Y
849_Ct_F	F	N	-	-	-	8	-	8	Y
850_Ct_F	F	N	-	-	-	10	-	10	Y
851_Ct_F	F	N	-	-	-	1	-	1	Y
852_Ct_F	F	N	-	-	-	2	-	2	Y
854_Ct_F	F	N	-	-	-	1	-	1	Y
855_Ct_F	F	N	-	-	-	5	-	5	Y
857_Ct_F	F	N	-	-	-	1	-	1	Y
862_Ct_F	F	N	-	-	-	3	-	3	Y
864_Ct_F	F	N	-	-	-	2	-	2	Y
865_Ct_F	F	N	-	-	-	1	-	1	Y
866_Ct_F	F	N	-	-	-	1	-	1	Y
877_Ct_F	F	N	-	-	-	1	-	1	Y
879_Ct_F	F	N	-	-	-	1	-	1	Y
880_Ct_F	F	N	-	-	-	2	-	2	Y
881_Ct_F	F	N	-	-	-	2	-	2	Y
883_Ct_F	F	N	-	-	-	2	-	2	Y
885_Ct_F	F	N	-	-	-	-	1	1	Y
886_Ct_F	F	N	-	-	-	-	1	1	Y
887_Ct_M	M	N	-	-	-	-	2	2	-
888_Ct_M	M	N	-	-	-	-	1	1	-
889_Ct_F	F	N	-	-	-	-	1	1	Y
890_Ct_F	F	N	-	-	-	-	1	1	Y
891_Ct_F	F	N	-	-	-	-	1	1	Y
892_Ct_F	F	N	-	-	-	-	7	7	Y
893_Ct_F	F	N	-	-	-	-	1	1	Y
894_Ct_F	F	N	-	-	-	-	1	1	Y
895_Ct_F	F	N	-	-	-	-	1	1	Y
896_Ct_F	F	N	-	-	-	-	1	1	Y
897_Ct_F	F	N	-	-	-	-	1	1	U
898_Ct_F	F	N	-	-	-	-	1	1	Y
899_Ct_F	F	N	-	-	-	-	1	1	Y
900_Ct_F	M	N	-	-	-	-	1	1	-
901_Ct_F	F	N	-	-	-	-	2	2	Y
902_Ct_F	F	N	-	-	-	-	1	1	Y
903_Ct_F	F	N	-	-	-	-	1	1	Y
904_Ct_F	F	N	-	-	-	-	1	1	Y
905_Ct_F	F	N	-	-	-	-	1	1	Y
906_Ct_F	F	N	-	-	-	-	1	1	Y
907_Ct_F	F	N	-	-	-	-	1	1	Y
908_Ct_F	F	N	-	-	-	-	2	2	Y
909_Ct_F	F	N	-	-	-	-	1	1	Y
910_Ct_F	F	N	-	-	-	-	1	1	U
911_Ct_F	F	N	-	-	-	-	1	1	Y
912_Ct_F	F	N	-	-	-	-	2	2	Y
913_Ct_F	F	N	-	-	-	-	1	1	Y
914_Ct_F	F	N	-	-	-	-	1	1	Y
915_Ct_F	F	N	-	-	-	-	1	1	Y
916_Ct_F	F	N	-	-	-	-	1	1	Y
917_Ct_F	F	N	-	-	-	-	3	3	Y
918_Ct_F	F	N	-	-	-	-	2	2	Y
919_Ct_F	F	N	-	-	-	-	1	1	Y
920_Ct_F	F	N	-	-	-	-	1	1	Y
921_Ct_F	F	N	-	-	-	-	3	3	Y
922_Ct_F	F	N	-	-	-	-	4	4	Y
923_Ct_F	F	N	-	-	-	-	1	1	Y
924_Ct_F	F	N	-	-	-	-	2	2	Y
925_Ct_F	F	N	-	-	-	-	1	1	Y
926_Ct_F	F	N	-	-	-	-	1	1	Y
927_Ct_F	F	N	-	-	-	-	1	1	Y
928_Ct_F	F	N	-	-	-	-	1	1	U
929_Ct_F	F	N	-	-	-	-	1	1	Y
930_Ct_F	F	N	-	-	-	-	2	2	Y
931_Ct_F	F	N	-	-	-	-	1	1	Y
932_Ct_F	F	N	-	-	-	-	3	3	Y
933_Ct_F	F	N	-	-	-	-	1	1	Y
934_Ct_F	F	N	-	-	-	-	1	1	Y
935_Ct_F	F	N	-	-	-	-	1	1	Y
936_Ct_F	F	N	-	-	-	-	1	1	Y
937_Ct_F	F	N	-	-	-	-	3	3	Y
938_Ct_F	F	N	-	-	-	-	1	1	Y
939_Ct_F	F	N	-	-	-	-	1	1	Y
940_Ct_F	F	N	-	-	-	-	1	1	Y
941_Ct_F	F	N	-	-	-	-	1	1	Y
942_Ct_F	F	N	-	-	-	-	2	2	Y
943_Ct_F	F	N	-	-	-	-	1	1	Y
944_Ct_F	F	N	-	-	-	-	1	1	Y
945_Ct_F	F	N	-	-	-	-	1	1	Y
946_Ct_F	F	N	-	-	-	-	1	1	Y
947_Ct_F	F	N	-	-	-	-	1	1	Y
948_Ct_F	F	N	-	-	-	-	1	1	Y
949_Ct_F	F	N	-	-	-	-	1	1	Y
950_Ct_F	F	N	-	-	-	-	3	3	Y
951_Ct_F	F	N	-	-	-	-	2	2	Y
952_Ct_F	F	N	-	-	-	-	1	1	Y
953_Ct_F	F	N	-	-	-	-	1	1	Y
954_Ct_F	F	N	-	-	-	-	1	1	Y
955_Ct_F	F	N	-	-	-	-	1	1	Y
956_Ct_F	F	N	-	-	-	-	1	1	Y
957_Ct_F	F	N	-	-	-	-	1	1	Y
958_Ct_F	F	N	-	-	-	-	1	1	Y
959_Ct_F	F	N	-	-	-	-	2	2	Y
960_Ct_F	F	N	-	-	-	-	2	2	Y
961_Ct_F	F	N	-	-	-	-	1	1	Y
962_Ct_F	F	N	-	-	-	-	2	2	Y
963_Ct_F	F	N	-	-	-	-	5	5	Y
964_Ct_F	F	N	-	-	-	-	2	2	Y
965_Ct_F	F	N	-	-	-	-	5	5	Y
966_Ct_F	F	N	-	-	-	-	1	1	Y
967_Ct_F	F	N	-	-	-	-	1	1	Y
968_Ct_F	F	N	-	-	-	-	1	1	Y
969_Ct_F	F	N	-	-	-	-	1	1	Y
970_Ct_F	F	N	-	-	-	-	1	1	Y
971_Ct_F	F	N	-	-	-	-	1	1	Y
972_Ct_F	F	N	-	-	-	-	2	2	Y
973_Ct_F	F	N	-	-	-	-	1	1	Y
974_Ct_F	F	N	-	-	-	-	2	2	Y
975_Ct_F	F	N	-	-	-	-	1	1	Y
976_Ct_F	F	N	-	-	-	-	1	1	Y
977_Ct_F	F	N	-	-	-	-	1	1	Y
978_Ct_F	F	N	-	-	-	-	1	1	Y
979_Ct_F	F	N	-	-	-	-	1	1	Y
980_Ct_F	F	N	-	-	-	-	1	1	Y
981_Ct_F	F	N	-	-	-	-	1	1	Y
982_Ct_F	F	N	-	-	-	-	1	1	Y
983_Ct_F	F	N	-	-	-	-	1	1	Y
984_Ct_F	F	N	-	-	-	-	2	2	Y
985_Ct_F	F	N	-	-	-	-	1	1	Y
986_Ct_F	F	N	-	-	-	-	1	1	Y
987_Ct_F	F	N	-	-	-	-	1	1	Y
988_Ct_F	F	N	-	-	-	-	1	2	Y
989_Ct_F	F	N	-	-	-	-	1	2	Y
990_Ct_F	F	N	-	-	-	-	1	1	Y
991_Ct_F	F	N	-	-	-	-	1	1	Y
992_Ct_F	F	N	-	-	-	-	1	1	Y
993_Ct_F	F	N	-	-	-	-	1	1	Y
								1200
